# Supplementary material for: A sensitive metal–organic framework nanosensor with cation-introduced chirality for enantioselective recognition and determination of quinine and quinidine in human urine
Source: Royal Society of Chemistry journal article supplement (doi:10.1039/d0tc03952g), 2020-01-01
Supplement: d0tc03952g1.pdf [file d0tc03952g1.pdf]

## Supplementary material

### **A Sensitive Metal-Organic Frameworks Nanosensor with Cation-Introduced Chirality for Enantioselective Recognition and Determination of Quinine and Quinidine in Human Urine**

Tian-Yu Liu,<sup>a</sup> Xiang-Long Qu<sup>a</sup> and Bing Yan<sup>a,b,\*</sup>

<sup>a</sup> *School of Chemical Science and Engineering, Tongji University, Siping Road 1239, Shanghai 200092, China.*

<sup>b</sup> *School of Materials Science and Engineering, Liaocheng University, Liaocheng 252000, China*

---

\* Corresponding author: Email address: [byan@tongji.edu.cn](mailto:byan@tongji.edu.cn) (Bing Yan)

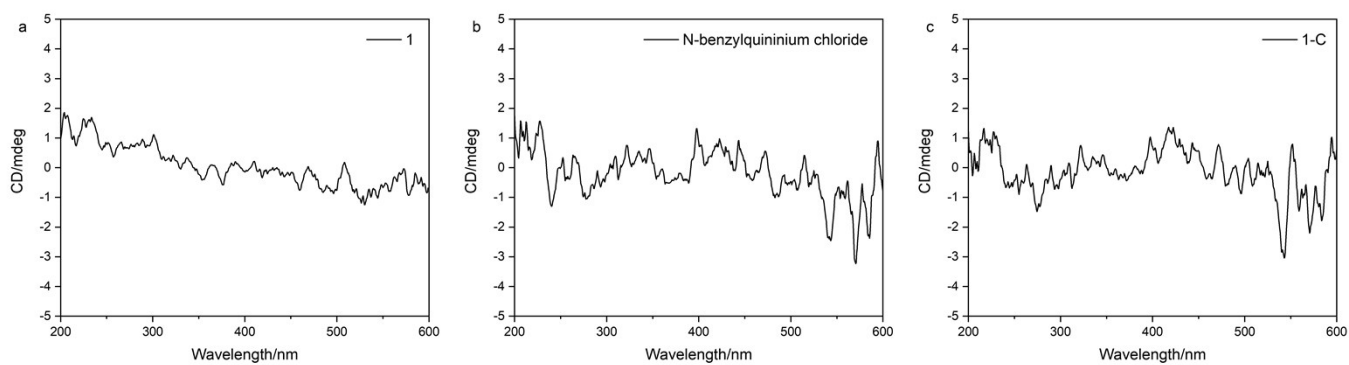

**Figure S1** Solid-state circular dichroism (CD) spectra of (a) **1** (b) *N*-benzylquininium chloride and (c) **1-C**.

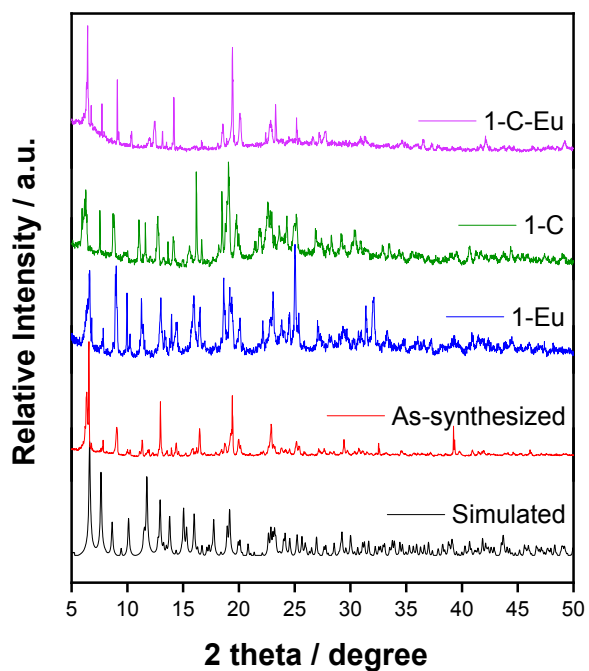

**Figure S2** Powder X-ray diffraction (PXRD) patterns of **1**, **1-Eu**, **1-C**, and **1-C-Eu**.

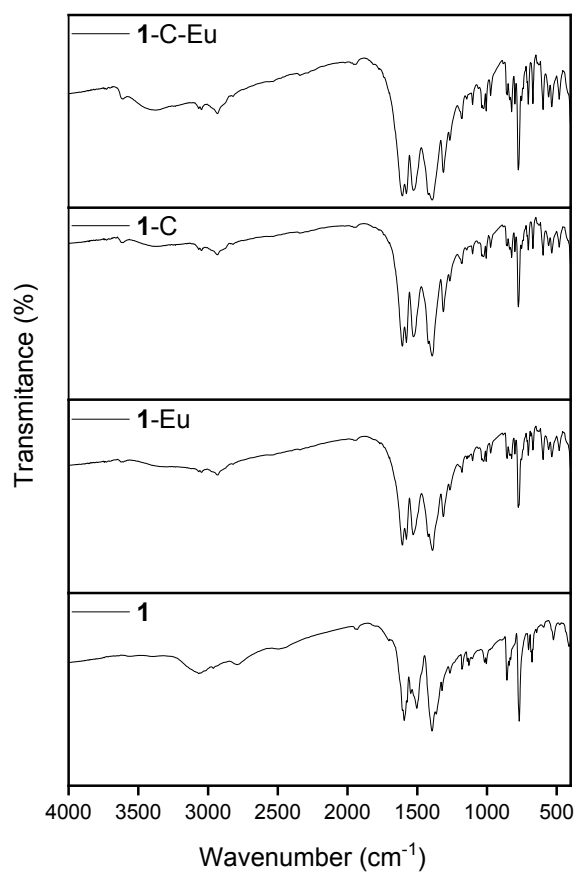

**Figure S3** Fourier transform infrared (FT-IR) spectra of **1**, **1-Eu**, **1-C**, and **1-C-Eu**.

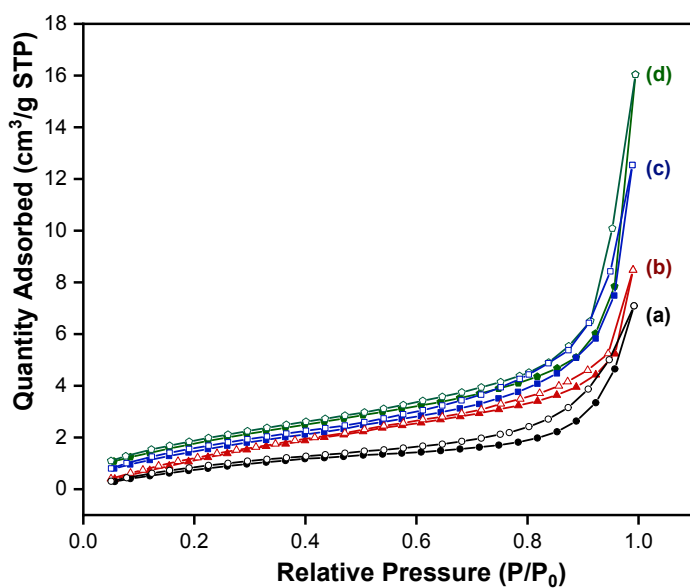

**Figure S4** N<sub>2</sub> adsorption (solid symbols) and desorption (hollow symbols) isotherms of (a) **1**, (b) **1-Eu**, (c) **1-C**, and (d) **1-C-Eu**.

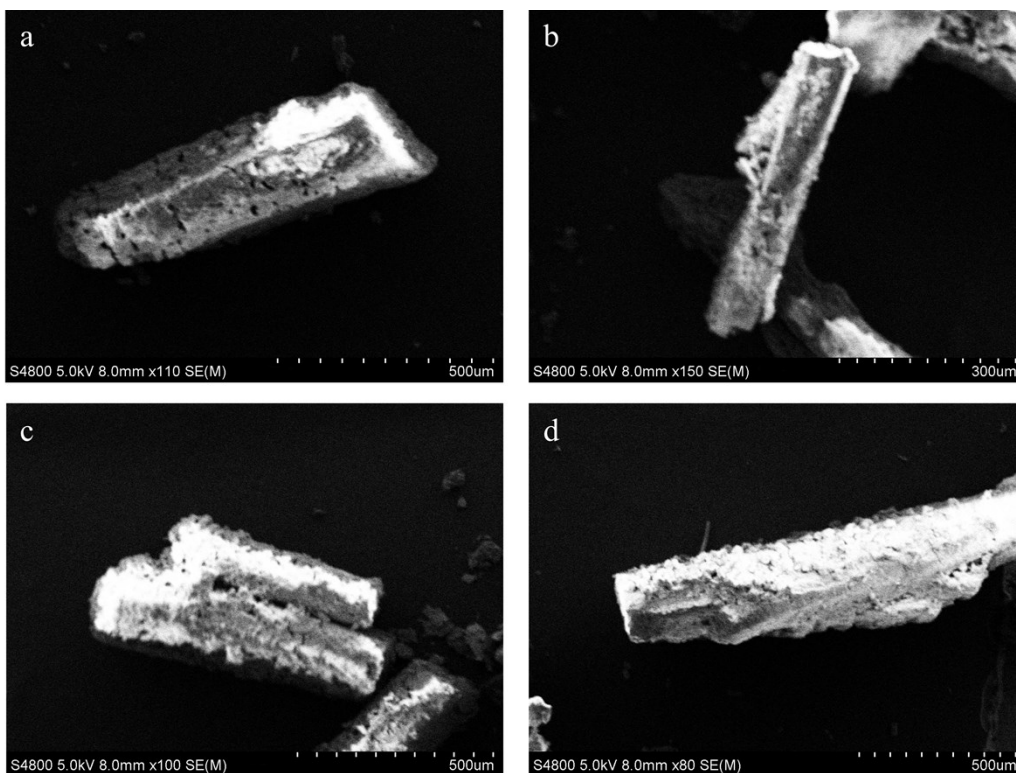

**Figure S5** Scanning electron microscope (SEM) images of (a) **1**, (b) **1-Eu**, (c) **1-C**, and (d) **1-C-Eu**.

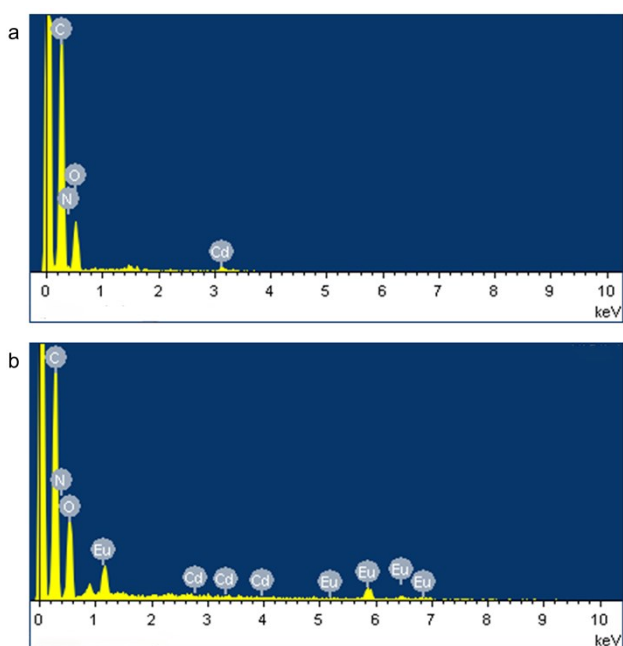

**Figure S6** Energy dispersive analysis by X-rays (EDX) spectra of (a) **1** and (b) **1-C-Eu**.

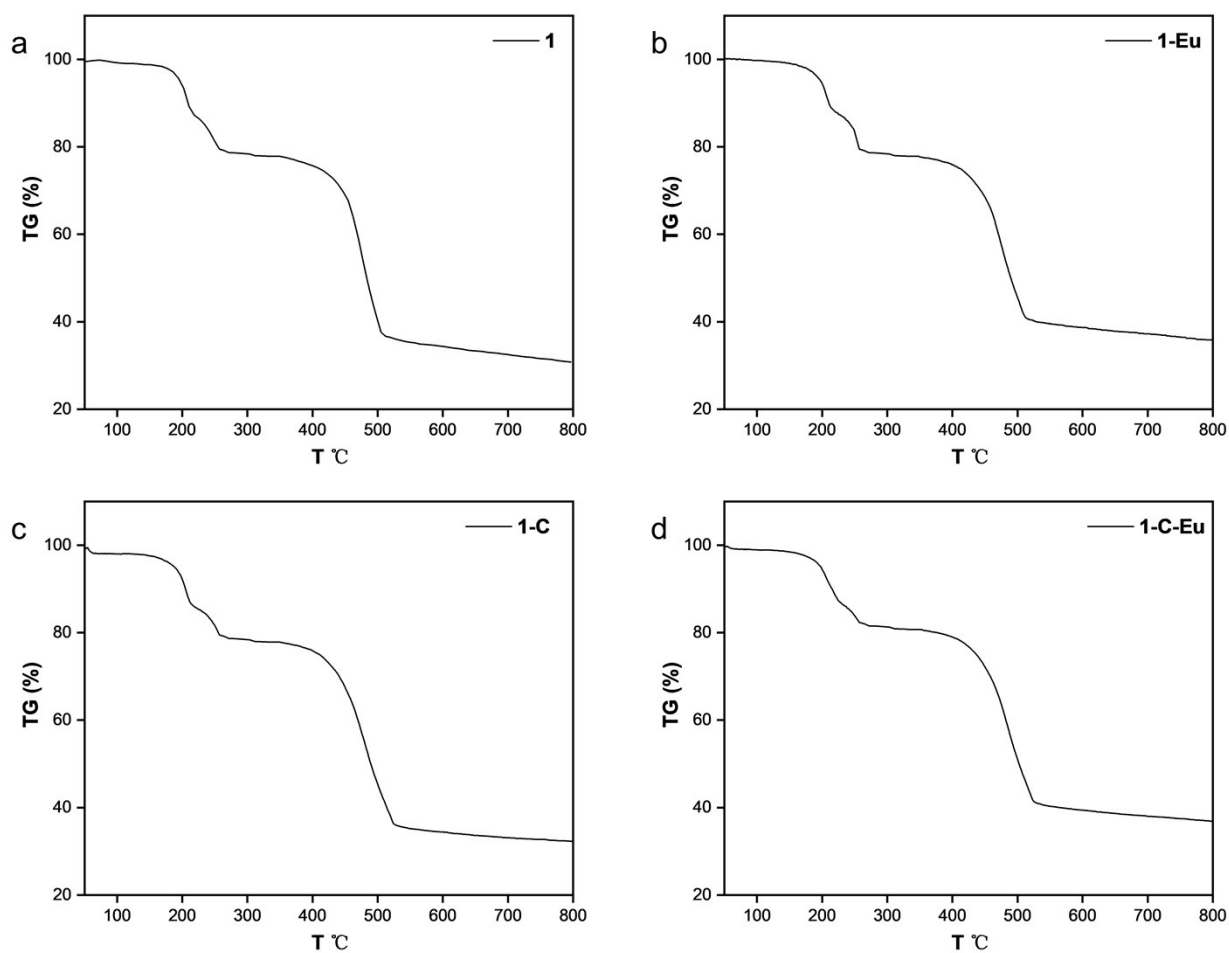

**Figure S7** Thermogravimetric analyses curves of (a) **1**, (b) **1-Eu**, (c) **1-C**, and (d) **1-C-Eu**.

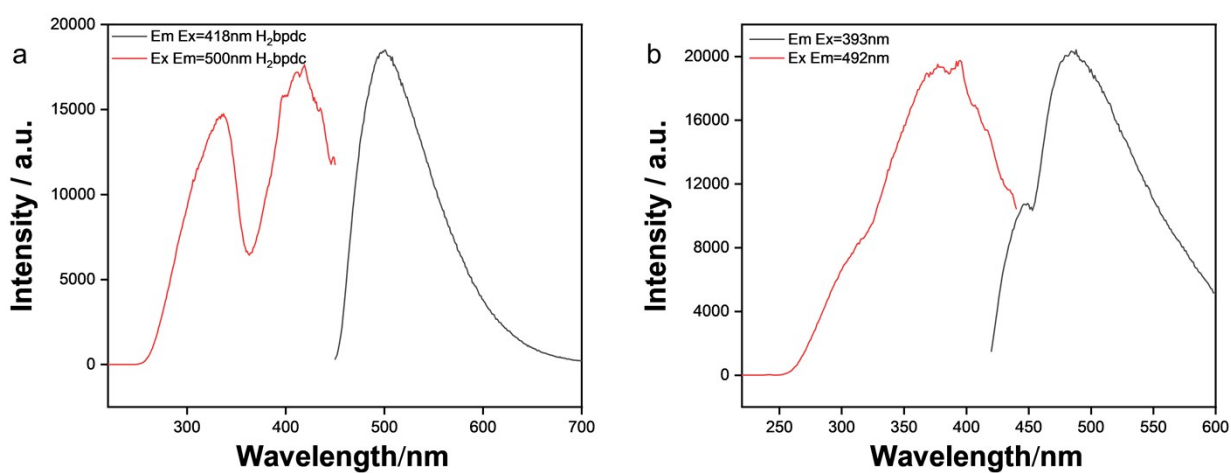

**Figure S8** Solid-state photoluminescent spectra of (a) H<sub>2</sub>bpdC and (b) **1**. (Red line: the excitation spectra, black line: the emission spectra)

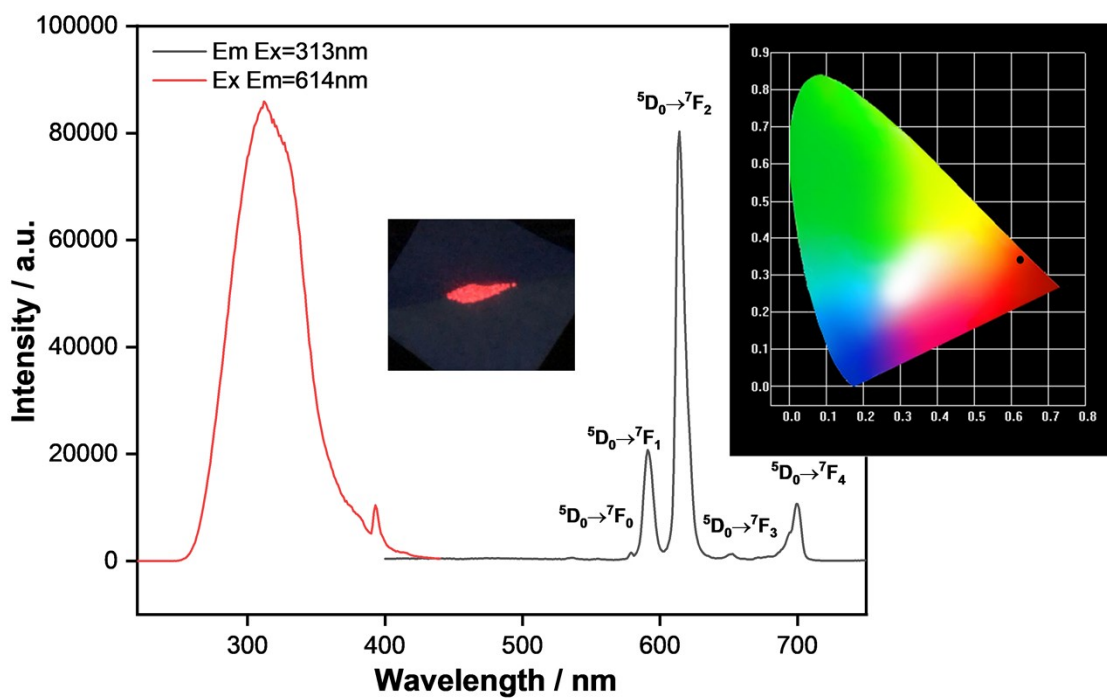

**Figure S9** Solid-state photoluminescent spectra of **1-Eu**. (Red line: the excitation spectra, black line: the emission spectra) The inserts are the photograph and CIE chromaticity diagram of **1-Eu** excited with 365 nm laboratory UV light.

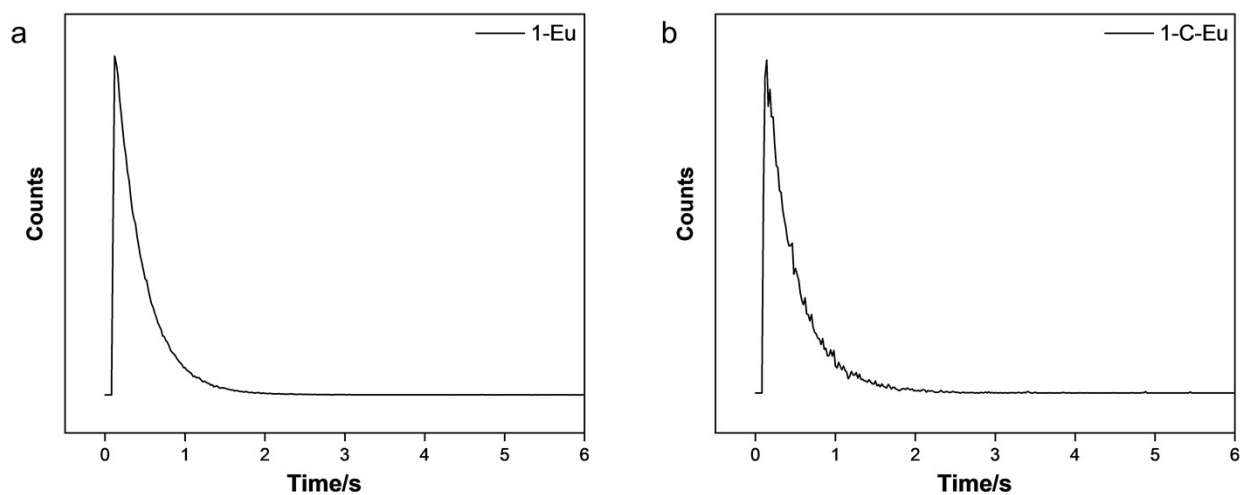

**Figure S10** Fluorescence lifetime patterns of  ${}^5D_0$  in the solid powder of (a) **1-Eu** and (b) **1-C-Eu**.

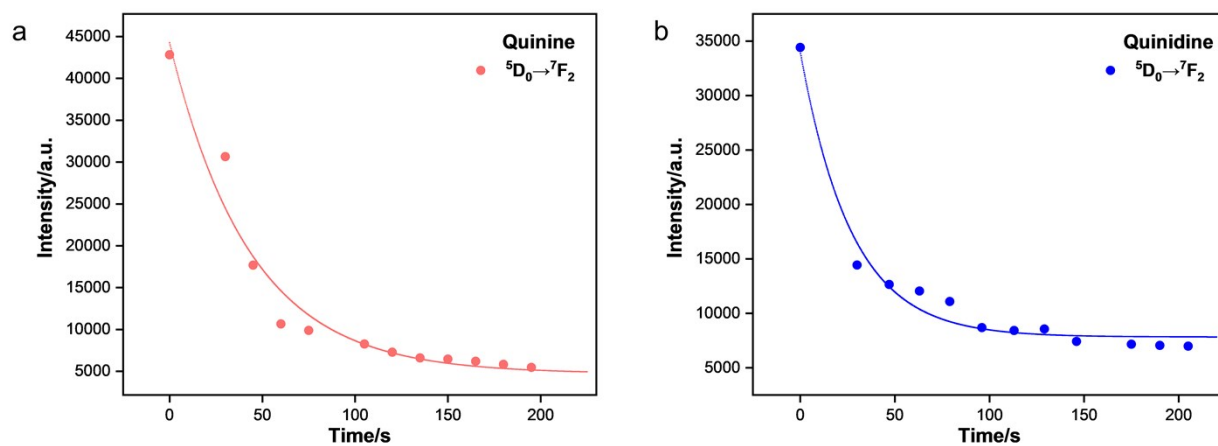

**Figure S11** Time-response emission intensities at 613 nm ( $\lambda_{\text{ex}} = 313$  nm) of the DMA suspensions of **1-C-Eu** upon the addition of (a) Quinine and (b) Quinidine ( $0.2\text{mg}\cdot\text{mL}^{-1}$ ).

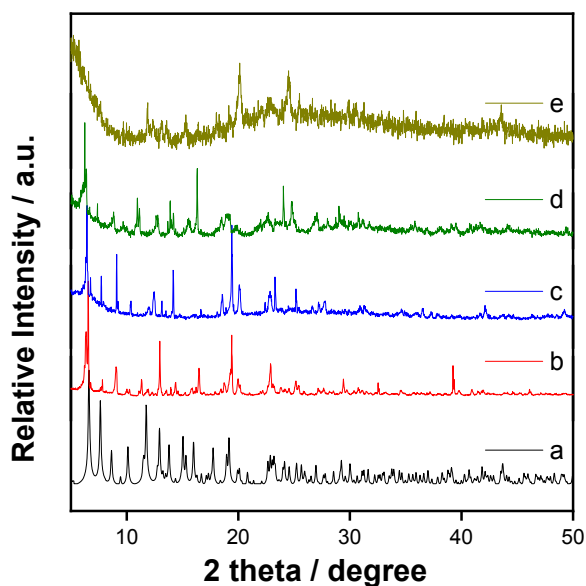

**Figure S12** PXRD patterns of **1-C-Eu** after immersed in different solvents for 4 hrs: (a) simulated. (b) As-synthesized **1**. (c) As-synthesized **1-C-Eu**. (d) **1-C-Eu** immersed in the mixed-solvent of DMA and aqueous solutions ( $v/v = 2/1$ ). (e) **1-C-Eu** immersed in aqueous solutions.

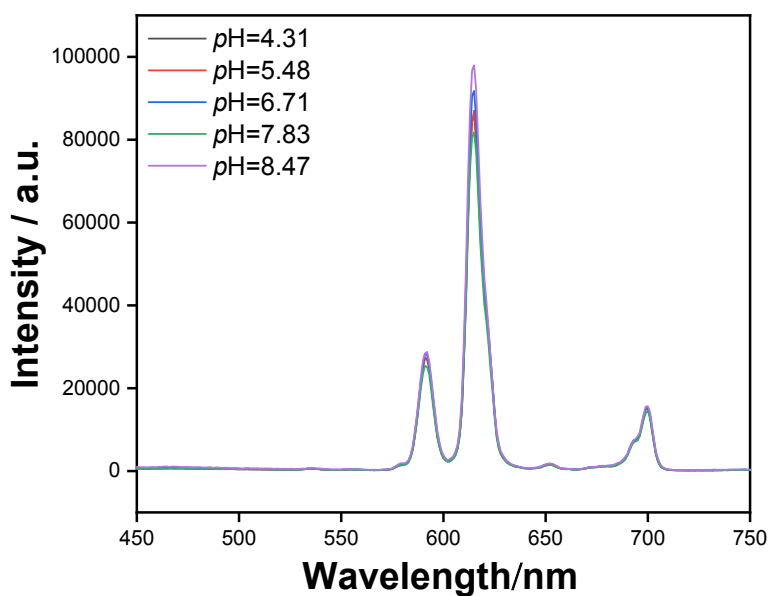

**Figure S13** Emission spectra of **1-Eu-C** at 613 nm ( $\lambda_{\text{ex}} = 313$  nm) immersed in the mixed-solvent of DMA and aqueous solutions of different pH ( $v/v = 2/1$ ).

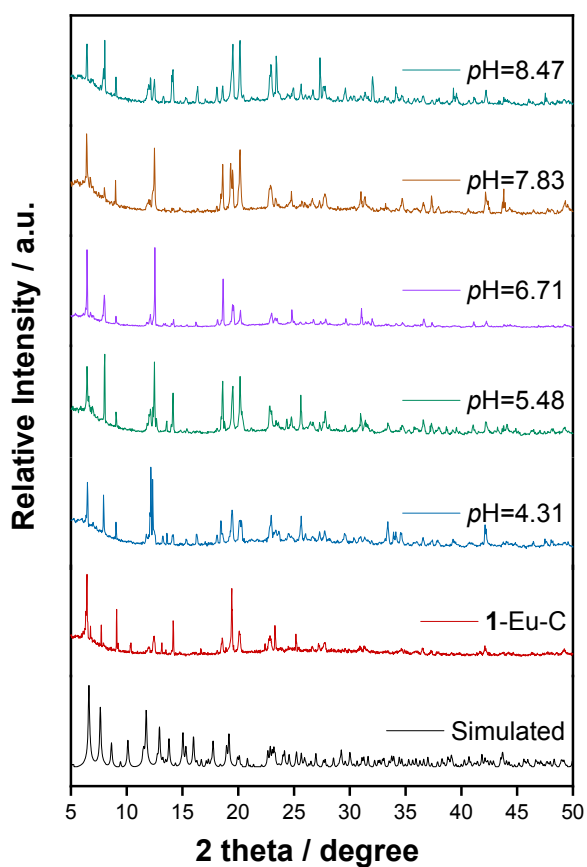

**Figure S14** PXRD patterns of **1-C-Eu** after immersed in the mixed-solvent of DMA and aqueous solutions of different pH for 4 hrs.



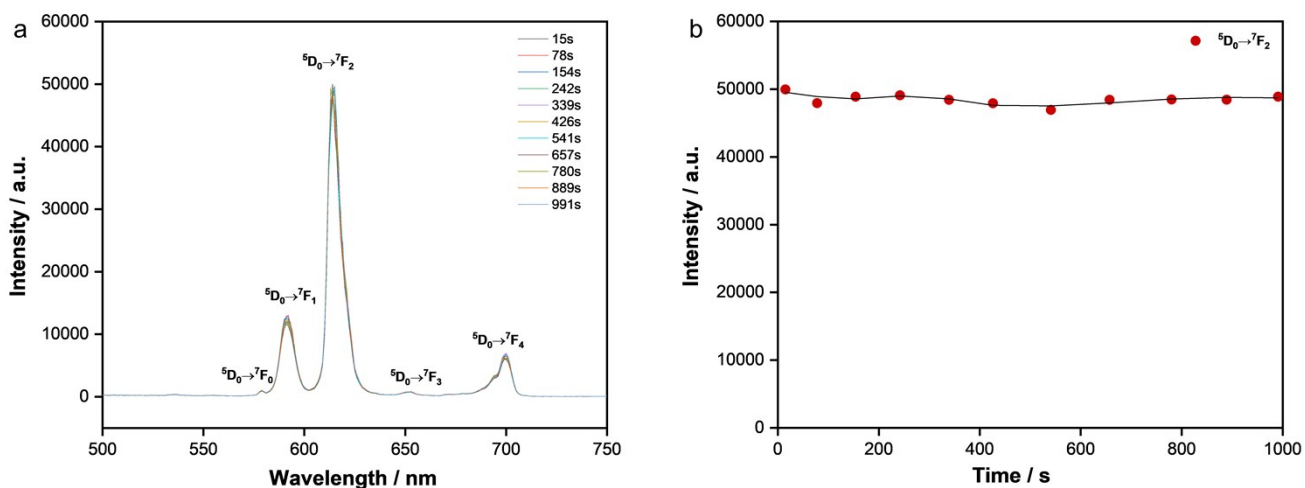

**Figure S15** Time dependence of (a) emission spectra and (b) emission intensities at 613 nm of **1-C-Eu** in the mixed-solvent of DMA and aqueous solutions ( $\lambda_{\text{ex}} = 313 \text{ nm}$ ).

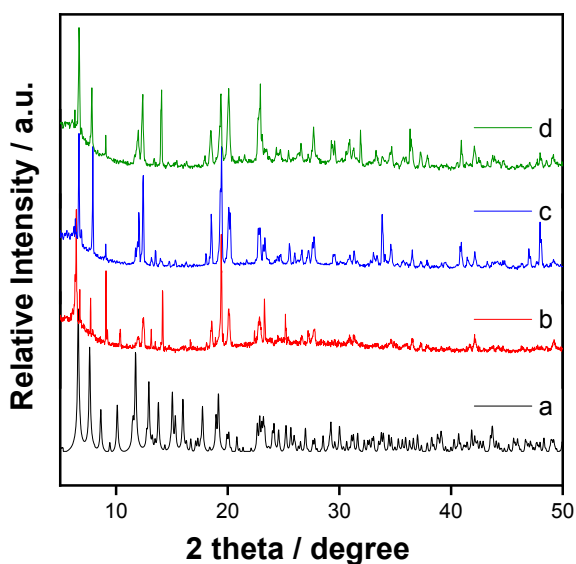

**Figure S16** PXRD patterns of **1-C-Eu** after soaking in different solutions for about 2 hrs: (a) simulated. (b) As-synthesized **1-C-Eu**. (c) **1-C-Eu** after soaked in the DMA solutions of Quinine ( $10^{-2} \text{ M}$ ). (d) **1-C-Eu** after soaked in the DMA solutions of Quinidine ( $10^{-2} \text{ M}$ ).

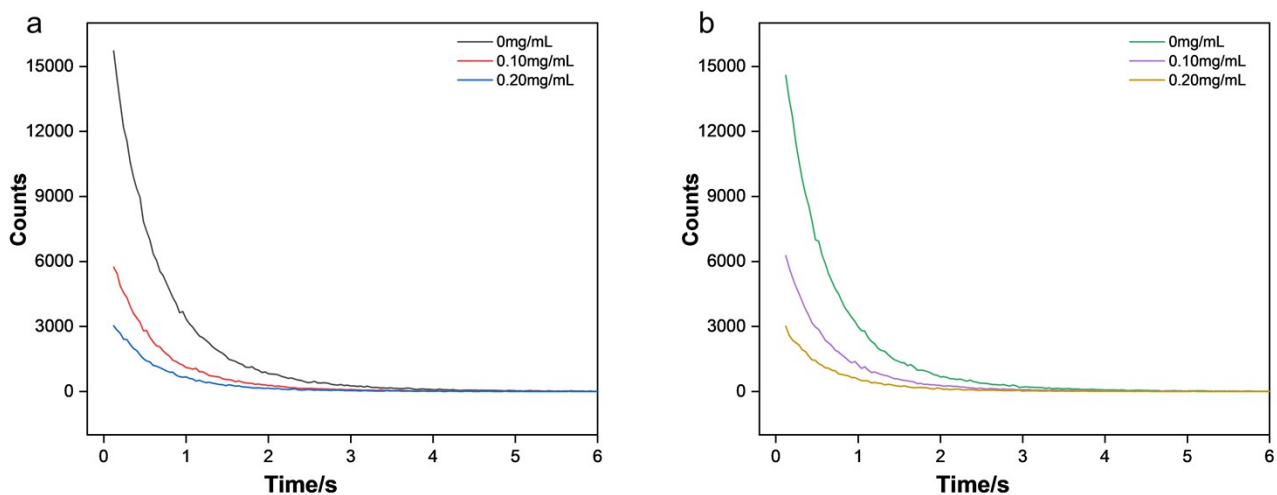

**Figure S17** Luminescence lifetime patterns of  ${}^5D_0$  in 1-Eu-C with the presence of (a) Quinine and (b) Quinidine in DMA solutions.

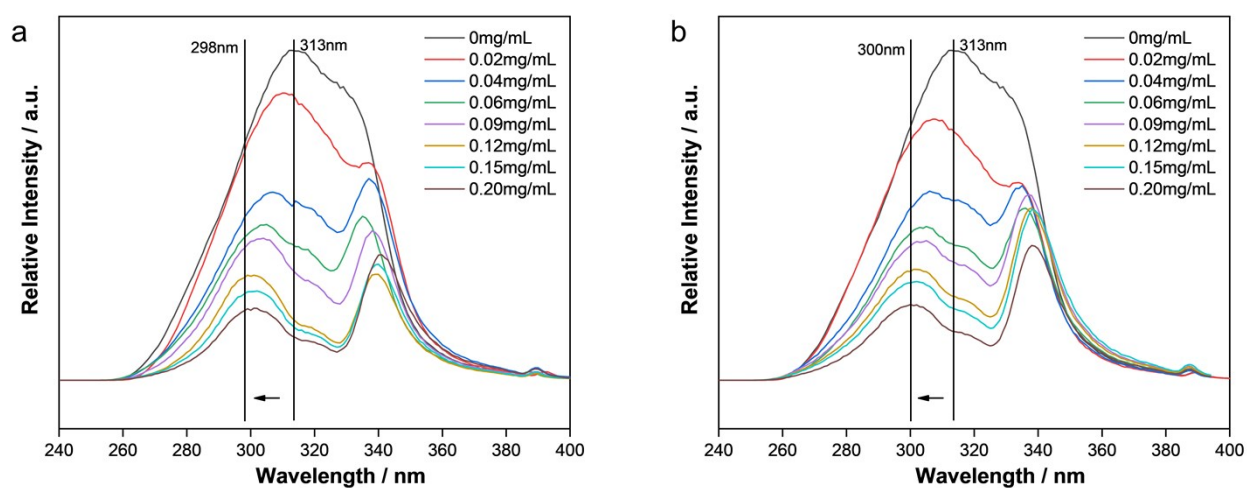

**Figure S18** Excitation spectra of 1-Eu-C suspensions with different concentrations of (a) Quinine and (b) Quinidine ( $\lambda_{em} = 613$  nm).

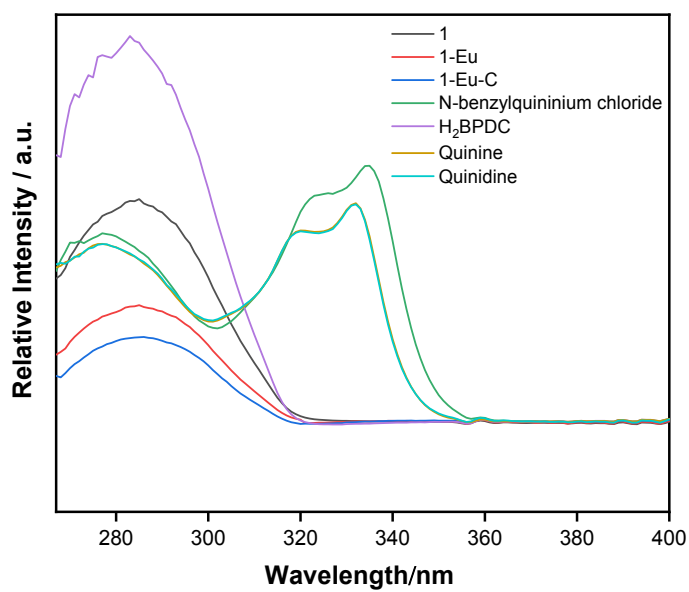

**Figure S19** UV-Vis absorption spectra of **1**, **1-Eu**, **1-C-Eu**, *N*-benzylquininium chloride, H<sub>2</sub>BPDC, Quinine and Quinidine in DMA.

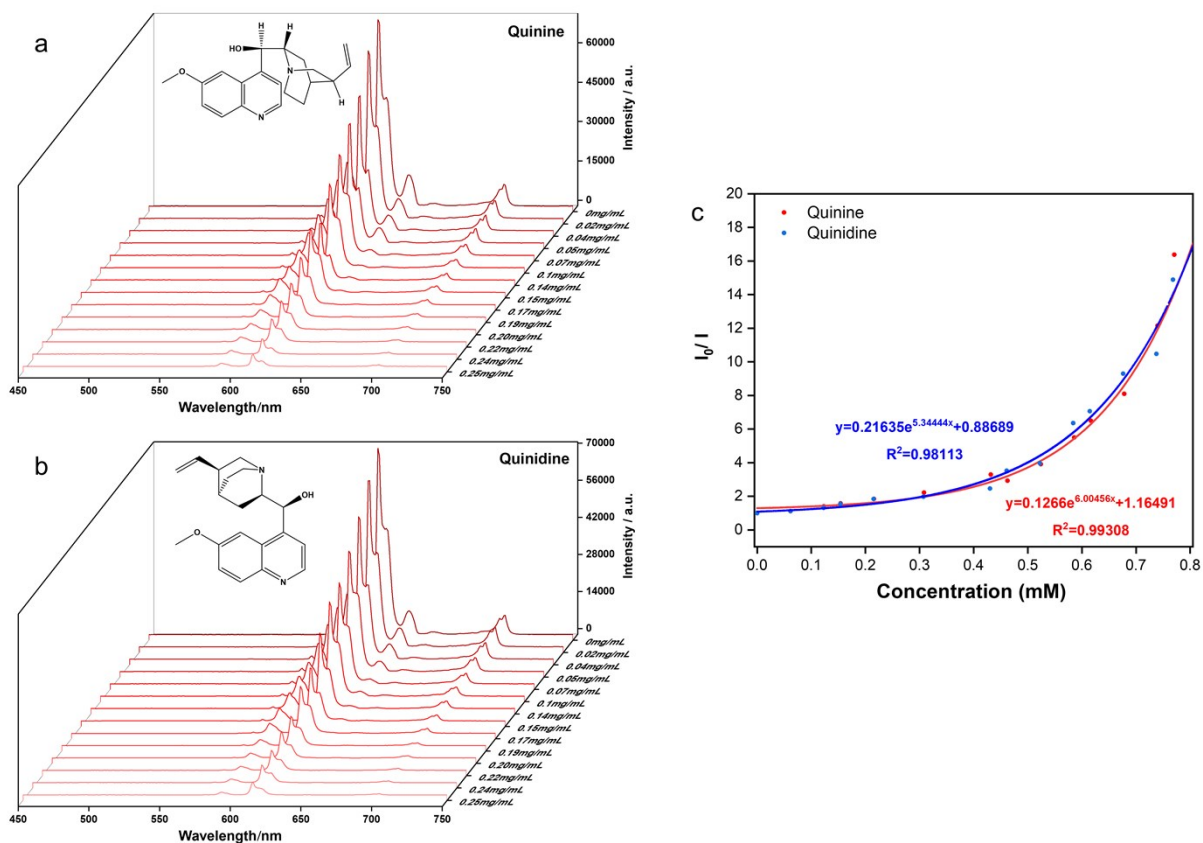

**Figure S20** Emission spectra of 1-Eu dispersed in in DMA solutions of (a) Quinine and (b) Quinidine at different concentrations ranging from 0 to 0.25 mg·mL<sup>-1</sup> ( $\lambda_{ex}$  = 313 nm). (c) The fitting curve of  $I_0/I$  versus concentration of Quinine and Quinidine.

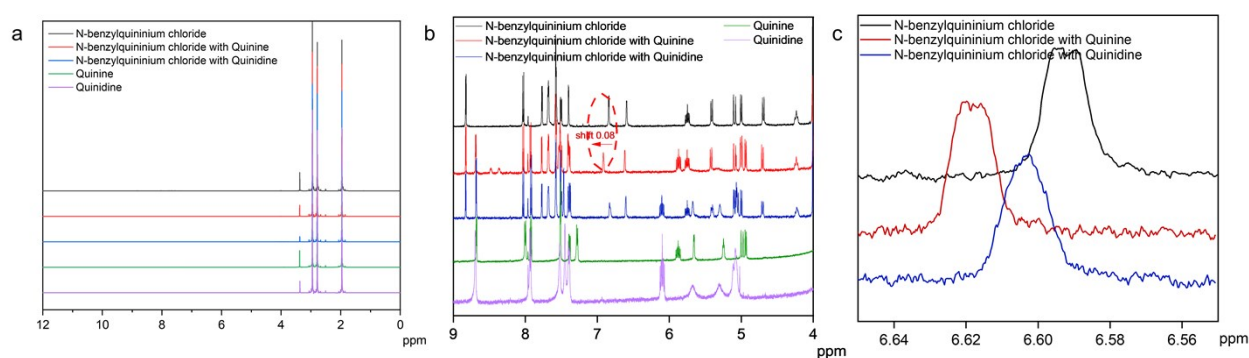

**Figure S21** Liquid <sup>1</sup>H NMR spectra of the analytes and *N*-benzylquininium chloride. (a) Chemical shift between 12 and 0 ppm. (b) Chemical shift between 9 and 4 ppm. (c) Chemical shift between 6.65 and 6.55 ppm.

**Table S1** Weight percentages of all elements in **1** and **1-C-Eu** determined by Energy dispersive analysis by X-rays (EDX).

| Element | Weight percentages |               |
|---------|--------------------|---------------|
|         | <b>1</b>           | <b>1-C-Eu</b> |
| C       | 62.49              | 57.31         |
| N       | 3.07               | 1.59          |
| O       | 31.50              | 28.69         |
| Cd      | 2.94               | 1.42          |
| Eu      | -----              | 10.99         |

**Table S2** Responses of luminescence lifetimes of **1-C-Eu** towards Quinine and Quinidine of various concentrations in DMA solutions.

| Analytes  | Concentrations          | $\tau$ ( $\mu$ s) |
|-----------|-------------------------|-------------------|
| Quinine   | 0 mg·mL <sup>-1</sup>   | 706.07            |
|           | 0.1 mg·mL <sup>-1</sup> | 667.29            |
|           | 0.2 mg·mL <sup>-1</sup> | 642.46            |
| Quinidine | 0 mg·mL <sup>-1</sup>   | 700.23            |
|           | 0.1 mg·mL <sup>-1</sup> | 672.77            |
|           | 0.2 mg·mL <sup>-1</sup> | 650.60            |
